# Supplementary material for: A one-pot two-step efficient metal-free process for the generation of PEO-b-PCL-b-PLA amphiphilic triblock copolymers
Source: Royal Society of Chemistry journal article supplement (doi:10.1039/c3ra47204c), 2014-01-01
Supplement: c3ra47204c.pdf [file c3ra47204c.pdf]

*Supporting Information for*

# **One-pot Two-Step Efficient Metal-Free Process for the Generation of PEO-*b*-PCL-*b*-PLA Amphiphilic Triblock Copolymers**

*Brieuc Guillerm,<sup>a</sup> Vincent Lemaux,<sup>b</sup> Bruno Ernould,<sup>c</sup> Jérôme Cornil,<sup>b</sup> Roberto Lazzaroni,<sup>b</sup> Jean-François Gohy,<sup>c</sup> Philippe Dubois<sup>a</sup> and Olivier Coulembier<sup>\*a</sup>*

<sup>a</sup>Center of Innovation and Research in Materials and Polymers (CIRMAP), Laboratory of Polymeric and Composite Materials, University of Mons (UMONS), Place du Parc, 23 7000 Mons, Belgium.

<sup>b</sup>Center of Innovation and Research in Materials and Polymers (CIRMAP), Laboratory for Chemistry of Novel Materials, University of Mons, 23 Place du Parc, B-7000, Mons, Belgium.

<sup>c</sup>Institute of Condensed Matter and Nanosciences, Bio- and Soft Matter, Université catholique de Louvain, Place L. Pasteur 1, B-1348, Louvain-la-Neuve, Belgium.

[Olivier.Coulembier@umons.ac.be](mailto:Olivier.Coulembier@umons.ac.be)

**A – MALDI-ToF spectra**

**B – Synthesis of PEO-*b*-P(CL-*co*-(L or D,L)LA) amphiphilic statistical copolymers**

**C – Molecular modeling**

**D – Physico-chemical characterization of the amphiphilic copolymers**

## A – MALDI-ToF spectra

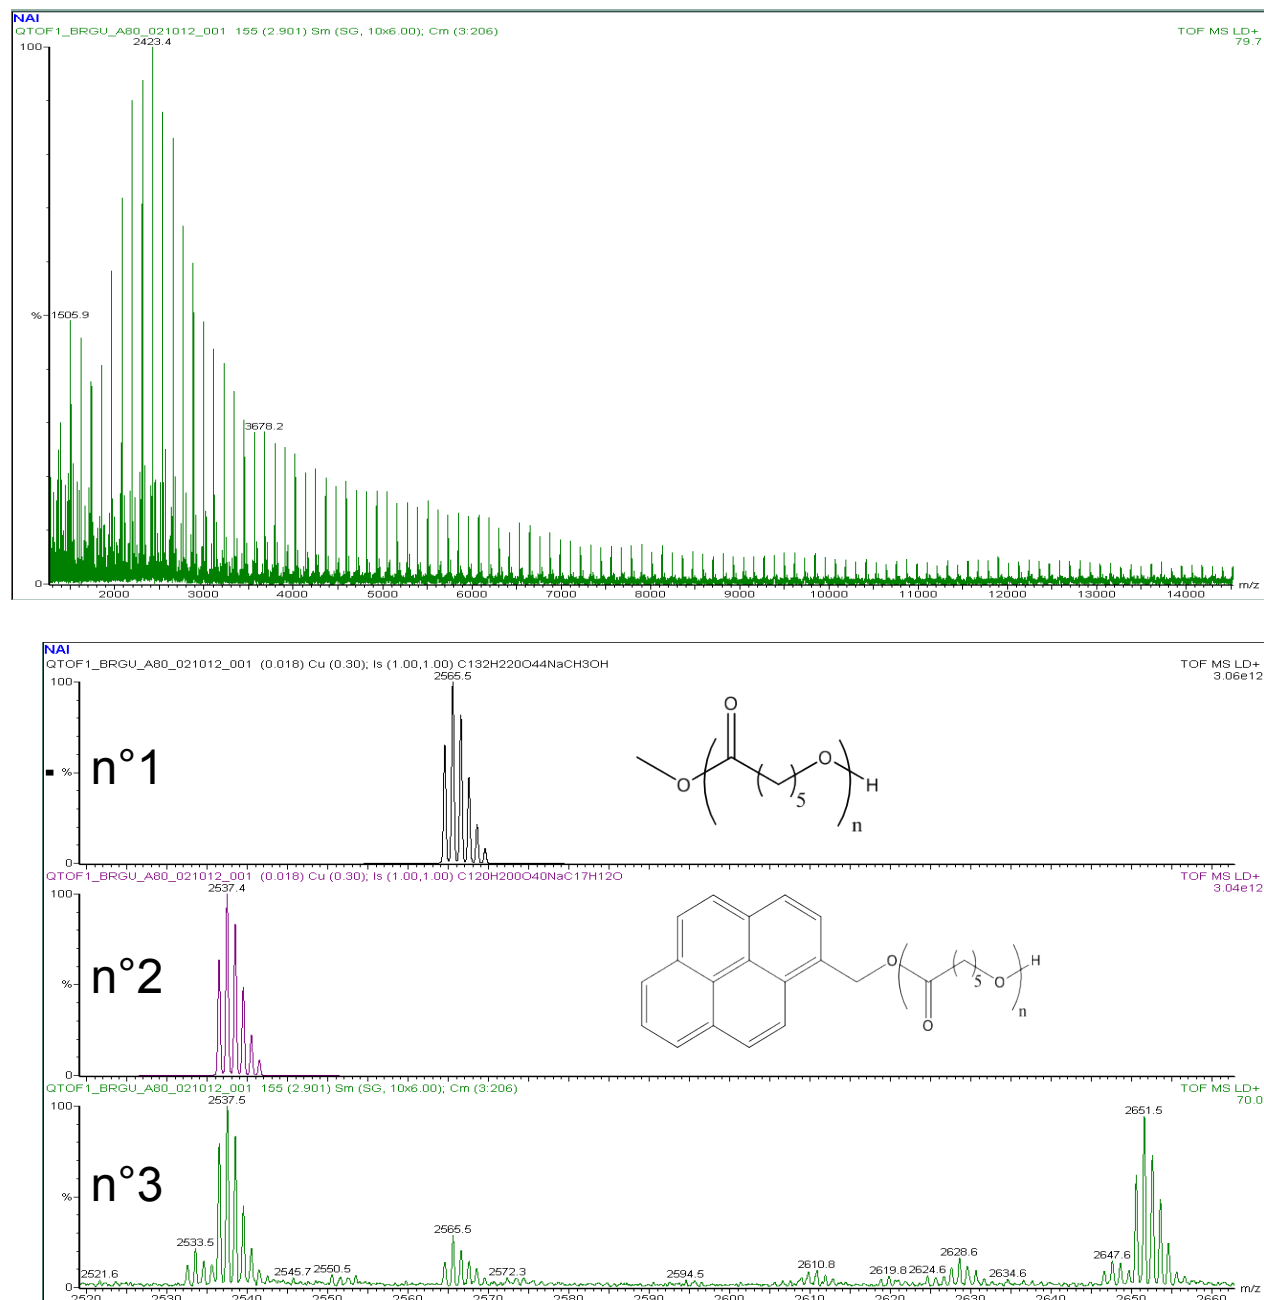

**Figure S1.** MALDI-ToF spectrum of PCL (top) initiated by 1-pyrenemethanol, catalyzed by TBD and precipitated in heptane. Theoretical model (n°1 and 2) and zoom of the MALDI-ToF spectrum of PCL (n°3) (bottom).

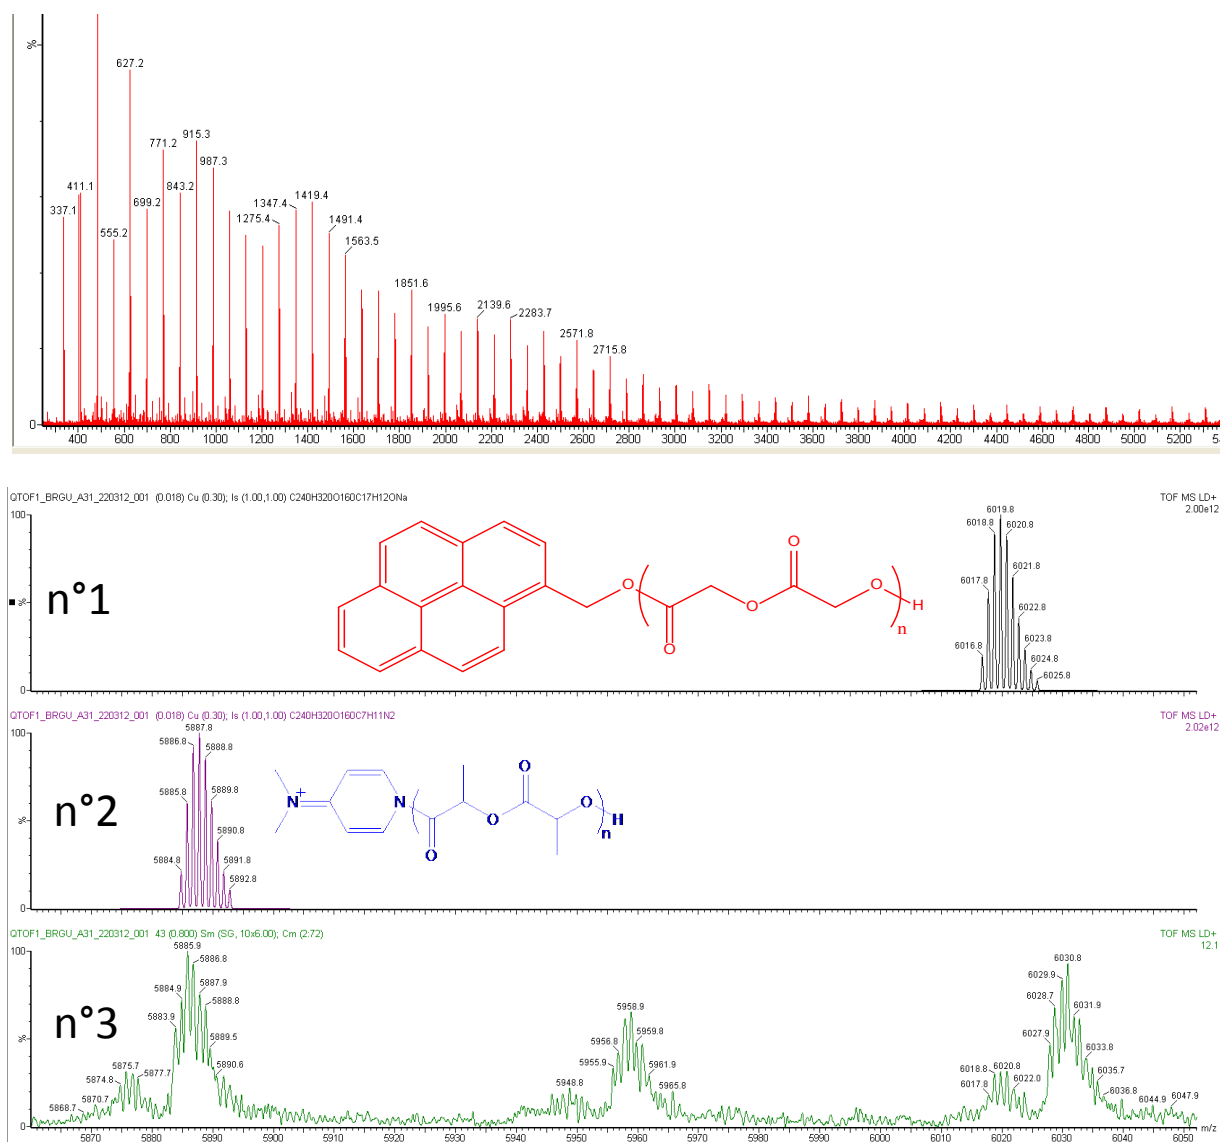

**Figure S2.** MALDI-ToF spectrum of P(L-LA) (top) initiated by 1-pyrenemethanol, catalyzed by DMAP and precipitated in heptane. Theoretical model (n°1 and 2) and zoom of the MALDI-ToF spectrum of P(L-LA) (n°3) (bottom).

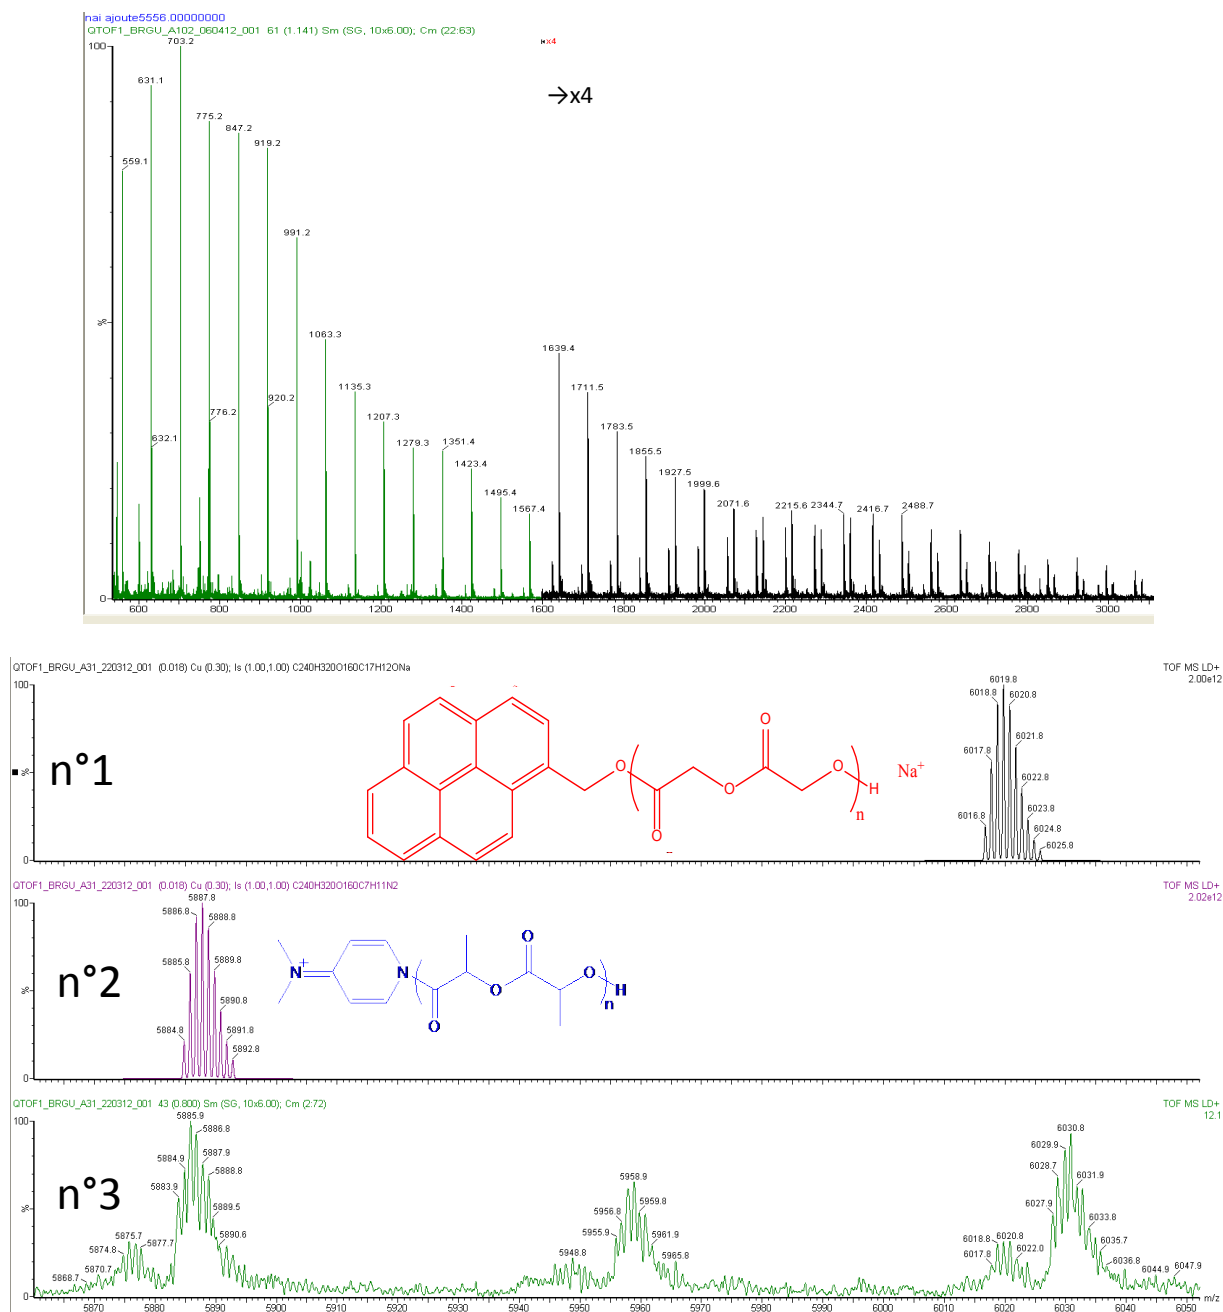

**Figure S3.** MALDI-ToF spectrum of P(L-LA) (top) initiated by 1-pyrenemethanol, catalyzed by DMAP/DCC and precipitated in methanol. Theoretical model (n°1 and 2) and zoom of the MALDI-ToF spectrum of P(L-LA) (n°3) (bottom).

## B – Synthesis of PEO-*b*-P(CL-*co*-(L or D,L)LA) amphiphilic statistical copolymers<sup>1</sup>

Statistical copolymers were synthesized by using 100 equivalents of  $\epsilon$ -CL, 100 equivalents of (L or D,L)LA and 0.01 equivalent of Sn(Oct)<sub>2</sub> relative to the initiator PEO-OH (5,000 g.mol<sup>-1</sup>). Copolymerizations were conducted at 160°C in bulk during 18 hours.

**Table S1.** Characterization data of amphiphilic statistical copolymers PEO-*b*-P(CL-*co*-(L or D,L)LA).

| polymer                                 | [Sn(Oct) <sub>2</sub> ] <sub>0</sub><br>/[PEO] <sub>0</sub> | M <sub>n,th</sub><br>(g.mol <sup>-1</sup> ) | M <sub>n,NMR</sub><br>(g.mol <sup>-1</sup> ) | M <sub>n,exp</sub> <sup>a</sup><br>(g.mol <sup>-1</sup> ) | Đ <sup>a</sup> | Yield<br>(%) |
|-----------------------------------------|-------------------------------------------------------------|---------------------------------------------|----------------------------------------------|-----------------------------------------------------------|----------------|--------------|
| PEO- <i>b</i> -P(CL- <i>co</i> -L-LA)   | 0.01/1                                                      | 13,800                                      | 14,800                                       | 22,500                                                    | 1.62           | 77           |
| PEO- <i>b</i> -P(CL- <i>co</i> -D,L-LA) | 0.01/1                                                      | 14,100                                      | 15,900                                       | 20,000                                                    | 1.65           | 79           |

a: SEC in THF (+2% TEA), PS standards, 1 mL.min<sup>-1</sup>, T = 35°C.

## C – Molecular modeling

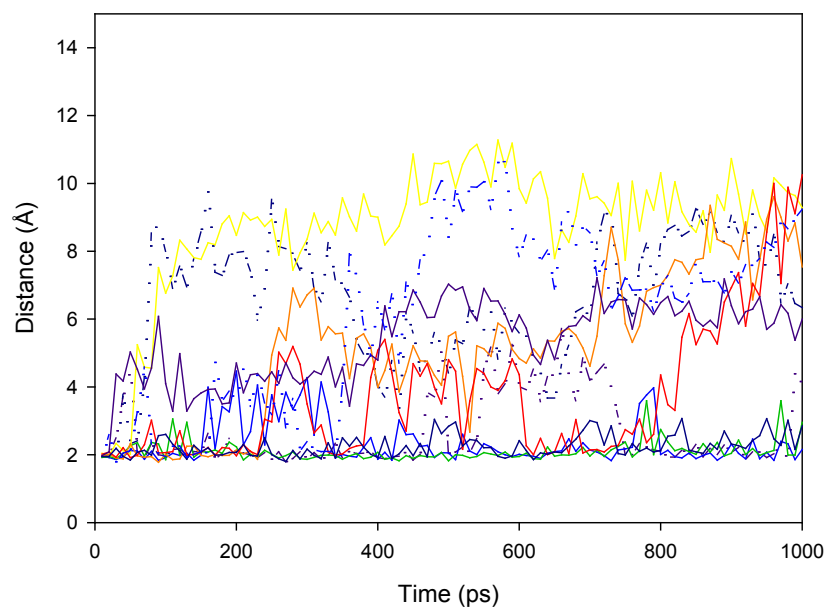

(a)

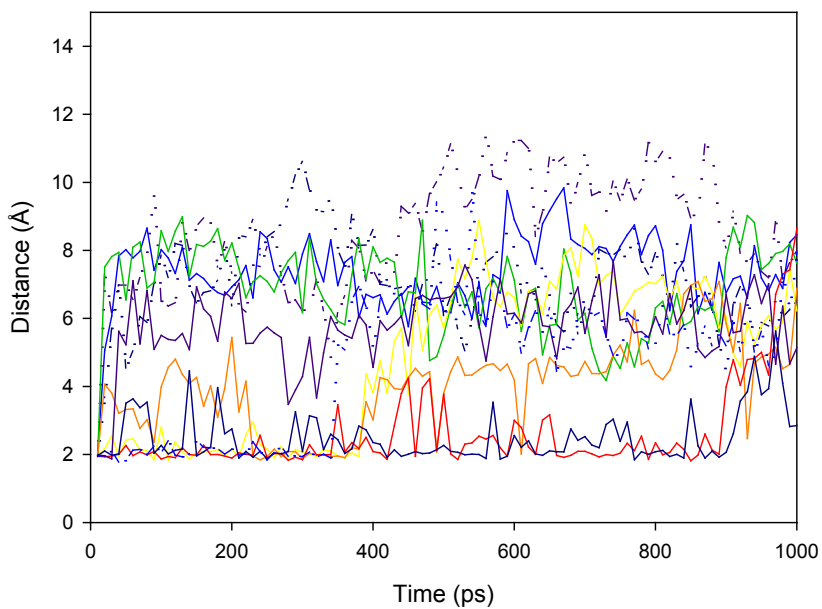

(b)

**Figure S4.** Evolution of the distance between the nitrogen atom #4 (see Table 4) of TBD and the hydrogen atom of the hydroxyl group of the initiator ( $d_{N-H}$ ) as a function of the time in the first ns of

the MD runs for system 1 (a) (1-pyrenemethanol initiator, top) and system 2 (b) (PEO initiator, bottom).

#### D – Physico-chemical characterization of amphiphilic copolymers

**Table S2.** Characterization of amphiphilic copolymers in water by DLS experiments.

| Copolymer                                  | CONTIN      | Cumulant    |      | Angle (°) |
|--------------------------------------------|-------------|-------------|------|-----------|
|                                            | $R_{H,app}$ | $R_{H,app}$ | PDI  |           |
|                                            | 31          | 31          | 0.04 | 60        |
| <b>PEO-<i>b</i>-P(CL-<i>co</i>-L-LA)</b>   | 31.5        | 31.5        | 0.04 | 90        |
|                                            | 32          | 31.5        | 0.07 | 120       |
|                                            | 35.5        | 36          | 0.12 | 60        |
| <b>PEO-<i>b</i>-P(CL-<i>co</i>-D,L-LA)</b> | 35.5        | 35          | 0.10 | 90        |
|                                            | 35.5        | 34.5        | 0.11 | 135       |
|                                            | 32.5        | 32          | 0.07 | 60        |
| <b>PEO-<i>b</i>-PCL-<i>b</i>-P(L-LA)</b>   | 32          | 32          | 0.07 | 90        |
|                                            | 32.5        | 32          | 0.07 | 135       |
|                                            | 27          | 27.5        | 0.02 | 60        |
| <b>PEO-<i>b</i>-PCL-<i>b</i>-P(D,L-LA)</b> | 27.5        | 27.5        | 0.04 | 90        |
|                                            | 28          | 27.5        | 0.04 | 135       |

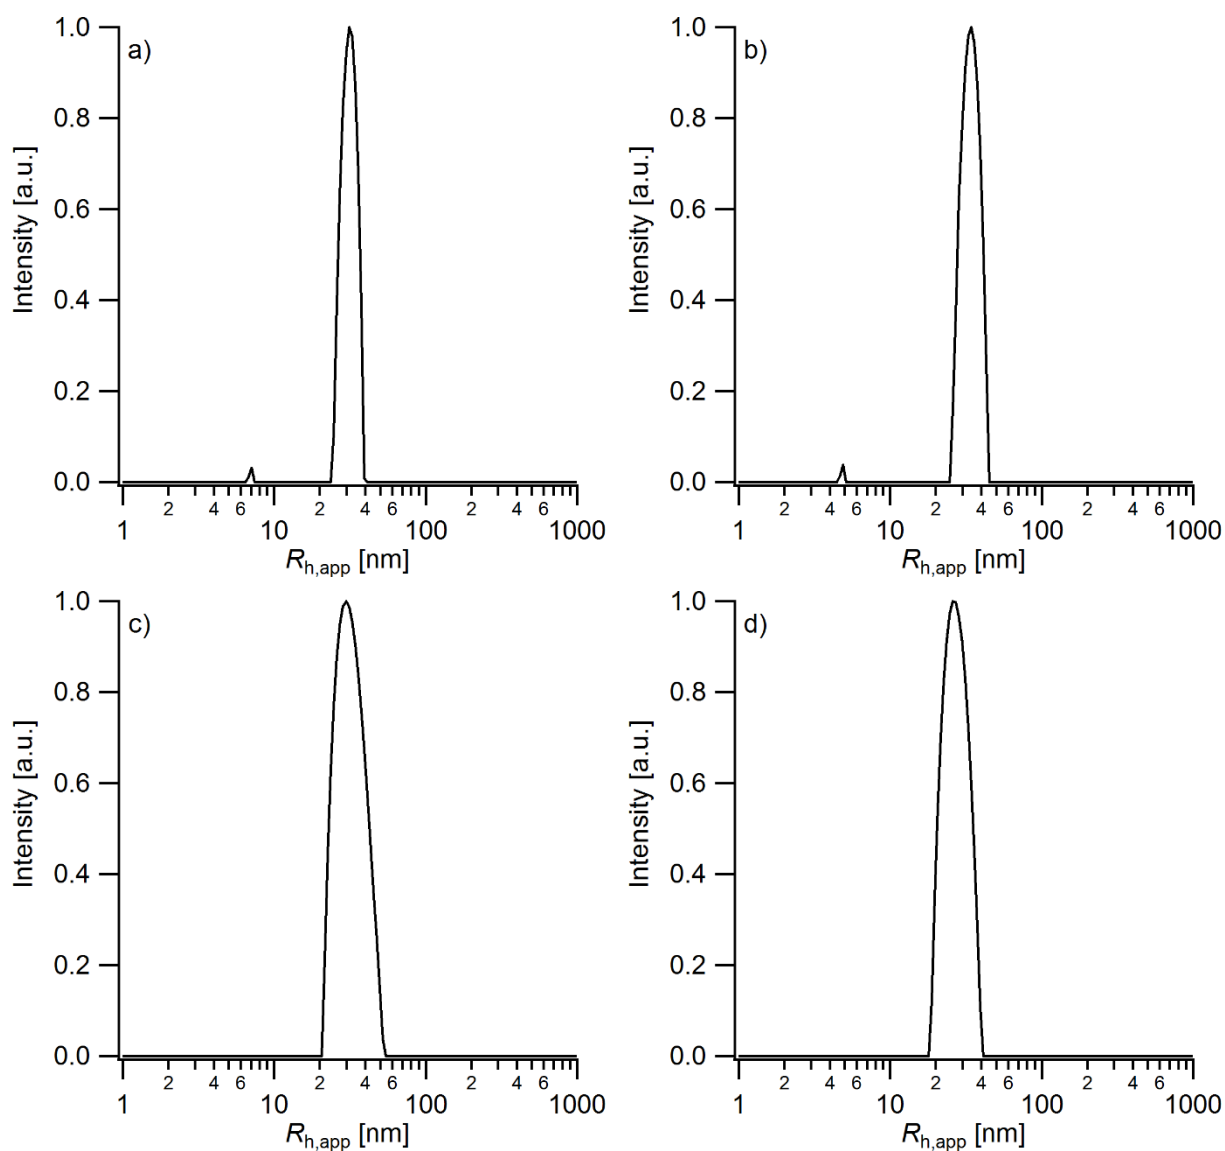

**Figure S5.** Distribution of the hydrodynamic radius calculated by CONTIN algorithm for 0.1% wt measured by DLS at scattering angle equal to  $\theta = 90^\circ$  and at 25 °C ((a) PEO-*b*-P(CL-*co*-L-LA), (b) PEO-*b*-P(CL-*co*-D,L-LA), (c) PEO-*b*-PCL-*b*-P(L-LA) and (d) PEO-*b*-PCL-*b*-P(D,L-LA)).

## References

- (1) Odent, J.; Leclère, P.; Raquez, J.-M.; Dubois, P. *European Polymer Journal* **2013**, *49*, 914.
